# Supplementary material
Source: PubMed Central journal article supplement (PMC3823376)
Supplement: NIHMS399311-supplement-1_si_001.pdf [file NIHMS399311-supplement-1_si_001.pdf]

### *P450cin Purification*

The plasmid with the P450cin gene inserted into pCWori vector (pCW-P450cin) with amino acids 2-7 deleted was provided by Dr. James J. De Voss. The deletion does not affect activity and circumvents the accumulation of heterogeneous N-terminal cleavage products during protein purification.<sup>1</sup> Protein expression for substrate-bound and substrate-free P450cin were identical. The pCW-P450cin construct was transformed into *E. coli* DH5 $\alpha$  purchased from Invitrogen™ and plated overnight at 37 °C on Lauria Bertani agar plates supplemented with 100  $\mu$ g/mL ampicillin. A single colony was used to inoculate 100 mL of 2x YT media overnight at 37 °C. Ten mL of overnight culture were used to inoculate each 1 L of TB media. Cells were allowed to grow at 37 °C with shaking at 220 rpm until an OD<sub>600</sub> of 0.6 and then induced with 0.5 mM IPTG. The temperature was then lowered to 27.5 °C and shaking set to 80 rpm. After 17 hours the cells were harvested and stored at -80 °C.

For preparation of substrate-free P450cin cell pellets were resuspended in buffer A (50 mM potassium phosphate pH 7.4, 50 mM KCl, 750  $\mu$ M 1,8-cineole). DTT was added to a final concentration of 0.5 mM. Protease inhibitors were added to final concentrations of 1  $\mu$ g/mL apostatin and pepstatin, 2  $\mu$ g/mL leupeptin and 0.1 mM PMSF. Resuspended cells were passed three times through a microfluidizer at 18,000 psi and centrifuged at 14,000 rpm for 40 minutes. The supernatant was then loaded onto a Q sepharose column pre-equilibrated in buffer A. The protein bound column was washed with 500 mL of buffer A followed by a stepwise increase in KCl from 200 mM to 300 mM where the protein eluted from the column. Buffer was exchanged by dialysis into buffer B (50 mM

potassium phosphate pH 6, 100 mM KCl and 750  $\mu$ M 1,8-cineole). The dialyzed protein was loaded onto a second Q sepharose column (50 mL XK16 column) at 5 mL/min. The column was washed with 10 column volumes of buffer A plus 100 mM KCl and eluted with 6 column volumes of 100-200 mM KCl gradient in buffer A. Fractions with an  $A_{392}/A_{280}$  ratio  $> 1$  and similar purity as determined by SDS-PAGE were pooled and dialyzed into buffer A. The dialyzed fractions were concentrated in a 30 kDa Amicon® ultrafiltration device before loading (1 mL/min) onto a 300 mL XK26 prep grade Superdex75® column equilibrated in the same buffer. Fractions were pooled according to purity as judged by the  $A_{392}/A_{280}$  ratio and SDS-PAGE. Heme incorporation was determined to be 98% using the alkaline pyridine hemochromogen assay<sup>2</sup> and an  $\epsilon_{\text{red557}} = 34.7 \text{ mM}^{-1} \text{ cm}^{-1}$  and known protein concentrations. Routine concentrations were determined using the extinction coefficient  $\epsilon_{450-490} = 91 \text{ mM}^{-1} \text{ cm}^{-1}$  for the carbon monoxide bound ferrous heme.<sup>3</sup>

.

A slightly different procedure was used for preparation of substrate-bound P450cin. The initial cell free extract was loaded onto a 30 mL Q HiTrap® column (GE Lifesciences) equilibrated in buffer A2 (50 mM potassium phosphate pH 7.4, 50 mM KCl and 2.5 mM 1,8-cineole). The protein was washed with 3 column volumes of buffer A with 100 mM KCl followed by elution in 250 mM KCl. Red fractions were pooled, dialyzed into buffer A and loaded onto a 40 mL XK16 DEAE column. The column was washed with 3 column volumes of buffer A2 followed by elution in 100 mM KCl. Fractions with the best  $A_{392}/A_{280}$  were pooled and diluted with 3 parts 50 mM Tris pH 7.5, 1.5 M ammonium sulfate, 2 mM cineole (buffer B2) and loaded onto an 40 mL XK16 phenyl sepharose fast

flow HiTrap® column. The protein was washed with 5 column volumes of the diluted buffer followed by 10 column volumes of 40% diluted buffer B2 (50 mM Tris pH 7.5, 2 mM cineole) and eluted in 50% diluted buffer B2. Fractions with an  $A_{392}/A_{280}$  ratio  $> 1$  were dialyzed into 50 mM Tris pH 7.5, 20 mM NaCl, 2 mM cineole. After concentration in an Amicon® with 30 kDa membrane the protein was loaded at 1 mL/min onto a 300 mL prep grade XK26/60 Superdex75® column equilibrated in the same buffer. Eluted fractions with  $A_{392}/A_{280} \geq 1.3$  were pooled and concentrated. Concentration and heme content were determined as above giving approximately 98% heme incorporation.

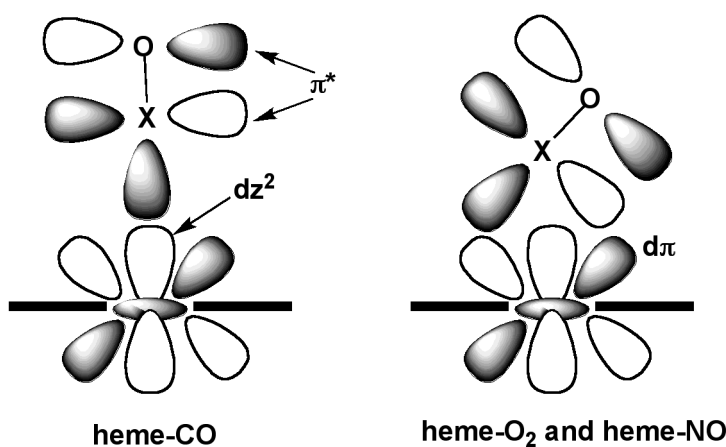

Figure S1 - Standard molecular orbital diagram of diatomic ligands bound to ferrous heme iron. In the CO complex the ligand antibonding  $\pi^*$  orbitals (only one is shown, the other one is perpendicular to the shown orbital) are empty. The electrons from the filled iron  $d_{\pi}$  orbitals (two of them with one shown) back donate to the ligand  $\pi^*$  orbitals so that CO favors a linear geometry. The occupied ligand  $\pi^*$  orbitals with O<sub>2</sub> and NO cause bending which enables the  $\pi^*$  orbitals to overlap (mix) with the iron  $d_{z^2}$  orbitals, resulting in less antibonding character. Thus NO is a good geometric mimic of O<sub>2</sub>.

1. Hawkes, D. B., Adams, G. W., Burlingame, A. L., Ortiz de Montellano, P. R., and De Voss, J. J. (2002) Cytochrome P450cin (CYP176A), Isolation, expression, and characterization, *J. Biol. Chem.* 277, 27725-27732.
2. Berry, E. A., and Trumpower, B. L. (1987) Simultaneous determination of hemes a, b, and c from pyridine hemochrome spectra, *Anal. Biochem.* 161, 1-15.
3. Omura, T., and Sato, R. (1964) The carbon monoxide-binding pigment of liver microsomes. Ii. Solubilization, purification, and properties, *J. Biol. Chem.* 239, 2379-2385.
